# Supplementary material for: Circulating MicroRNAs as Prognostic Molecular Biomarkers in Human Head and Neck Cancer: A Systematic Review and Meta-Analysis
Source: Hindawi journal article supplement (doi:10.1155/2019/8632018), 2019-11-18
Supplement: f1 [file 8632018.f1.pdf]

## **Supporting Information**

The scientific literature published from December 2006 to February 2019 was interrogated using 5 different search engines; Scopus, PubMed, Science Direct, Web of Science and Medline using key search words including “microRNA expression or miRNA expression”, ‘Head and Neck Cancer’, ‘Prognosis’, ‘Human’ and ‘Overall Survival’. Literature search results are noted in **supplementary table 1.**

Supplementary table 1: Literature search result for systematic review and meta-analysis.

| S.N | Keyword                                                 | Scopus  | PubMed    | Science Direct | Web of Science | Medline |
|-----|---------------------------------------------------------|---------|-----------|----------------|----------------|---------|
| 1   | Head and Neck Cancer                                    | 46,484  | 311,316   | 45,968         | 23,522         | 838     |
| 2   | miRNA expression                                        | 8,852   | 60,680    | 12,467         | 8,534          | 37      |
| 3   | Prognosis                                               | 876,089 | 1,625,231 | 574,795        | 325,739        | 12,126  |
| 4   | Head and neck cancer AND miRNA expression               | 52      | 2,149     | 348            | 37             | 7       |
| 5   | Head and neck cancer AND prognosis                      | 7,333   | 69,318    | 14,129         | 1,965          | 175     |
| 6   | miRNA expression AND prognosis                          | 1,327   | 7,778     | 3,746          | 1,031          | 12      |
| 7   | Head and neck cancer AND miRNA expression AND prognosis | 22      | 767       | 246            | 10             | 7       |

The scientific literature published from December 2006 to February 2019 were also interrogated in Pubmed search engine to analyse the role of circulating exosomal miRNAs in head and neck cancer prognosis using key words including “ Exosomal microRNA expression’, ‘Head and Neck Cancer’, ‘Prognosis’. Out of the 36 search results, only one study reported circulating exosomal miRNA (miR-9) and provided statistical parameters (Hazard Ratio and 95% Confidence Interval), hence included in our meta-analysis [38]. The flow chart for the selection of studies are presented in **supplementary figure 1**. All the studies those reported the circulating exosomal miRNAs in head and neck cancers are listed in **supplementary table 2**.

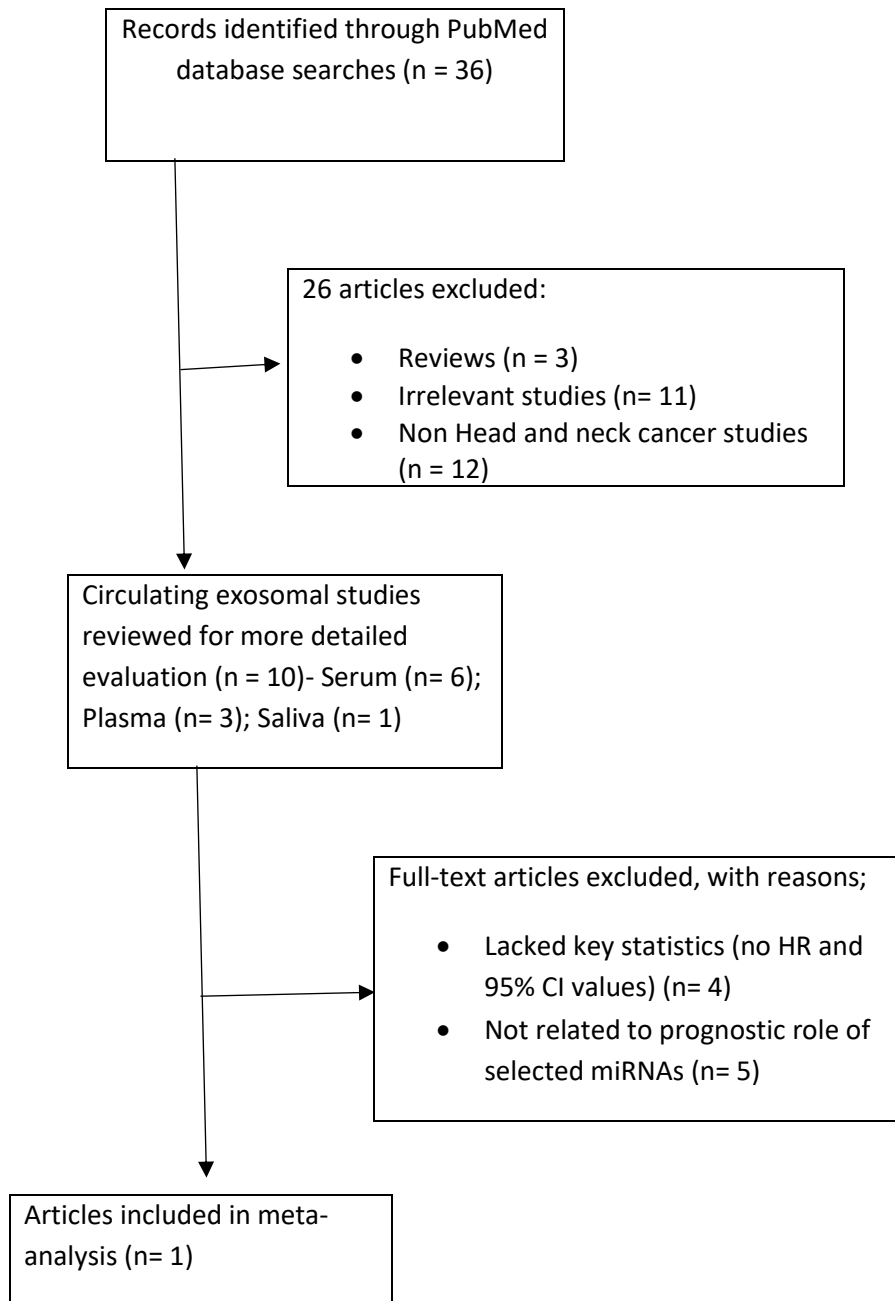

**Supplementary figure 1:** Flow chart of literature review and study selection process for circulating exosomal miRNAs.

Supplementary table 2: Characteristics of circulating exosomal miRNA studies interrogated during literature review.

| <b>S. No.</b> | <b>Study</b>               | <b>miRNA/Dysregulation</b>                                         | <b>Source of exosomal miRNAs</b>                 | <b>Role of miRNA</b>                      |
|---------------|----------------------------|--------------------------------------------------------------------|--------------------------------------------------|-------------------------------------------|
| 1             | Qin et al, 2019 [32]       | miR-196a/Upregulated                                               | Plasma (Head and Neck Cancer)                    | Prognosis (Only P value)                  |
| 2             | Tomasetti et al, 2018 [47] | miR-126/downregulated                                              | Serum (Intestinal-type Sinonasal Adenocarcinoma) | Tumor suppression                         |
| 3             | Lu et al, 2018 [35]        | miR-9/Downregulated                                                | Plasma (Nasopharyngeal Carcinoma)                | Prognosis (Included in the Meta-Analysis) |
| 4             | Bao et al., 2018 [48]      | miR-23a/Upregulated                                                | Serum (Nasopharyngeal Carcinoma)                 | Angiogenesis/prognosis (Only P value)     |
| 5             | Langevin et al, 2017 [49]  | miR-486-5p/miR-486-3p/Upregulated                                  | Saliva (Head and Neck Squamous Cell Carcinoma)   | Diagnosis                                 |
| 6             | Samsonov et al, 2016 [50]  | miR-21/upregulated<br>miR-181a-5p/Upregulated                      | Plasma (Papillary Thyroid Cancer)                | Diagnosis                                 |
| 7             | Ye et al, 2016 [37]        | miR-24-3p/Upregulated                                              | Serum (Nasopharyngeal Carcinoma)                 | Prognosis (Only P value)                  |
| 8             | Li et al, 2016 [51]        | miR-21/Upregulated                                                 | Serum (Oral Squamous Cell Carcinoma)             | Cell migration and Invasion               |
| 9             | Wang et al, 2014 [52]      | miR-21/Upregulated                                                 | Serum (Laryngeal Squamous Cell Carcinoma)        | Diagnosis                                 |
| 10            | Huang et al, 2018 [53]     | miR-1246, miR-1290, miR-335-5p, miR-127-3p, miR-122-5p/Upregulated | Serum (Laryngeal squamous cell Carcinoma)        | Progression                               |
